# Supplementary material for: Modified STOP-Bang questionnaire for detecting obstructive sleep apnea in individuals with a body mass index below 35 kg/m2
Source: PeerJ. 2025 Nov 11;13:e20310. doi: 10.7717/peerj.20310 (PMC12617366; doi:10.7717/peerj.20310)
Supplement: Supplemental Information 1 [file peerj-13-20310-s001.xlsx]

## Sheet: Sheet1
record_id	height cm	weight kg	snoring 1 yes	tired 1 yes	observed apnea 1 yes	hypertension 1 yes	bmi	bmi35	bmi23	age	age50	age40	neck circumference cm	neck40	neck35	sex 1 male	Original STOPBang	apnea hypopnea index	severity	OSA 1 yes	New STOPBang
200	160	48	1	1	1	0	18.7	0	0	71	1	1	33	0	0	0	4	0.9	0	0	4
123	177	80	1	0	1	1	25.5	0	1	50	0	1	39	0	1	0	3	1	0	0	6
65	183	100	0	0	0	1	29.9	0	1	21	0	0	45	1	1	0	2	1.3	0	0	3
105	163	43	0	0	0	1	16.2	0	0	29	0	0	33	0	0	0	1	1.4	0	0	1
60	177	80	1	0	0	1	25.5	0	1	51	1	1	38	0	1	0	3	1.8	0	0	5
57	170	95	1	1	0	1	32.9	0	1	28	0	0	41	1	1	1	5	1.9	0	0	6
147	165	49.9	1	1	0	0	18.3	0	0	28	0	0	34	0	0	1	3	2	0	0	3
51	160	72	1	0	0		28.1	0	1	51	1	1	33	0	0	1	3	2.2	0	0	4
146	161	68	0	1	0	0	26.2	0	1	67	1	1	34	0	0	1	3	2.3	0	0	4
196	165	53	1	0	0	0	19.5	0	0	50	0	1	40	0	1	0	1	2.5	0	0	3
197	180	77	1	1	0	0	23.8	0	1	42	0	1	41	1	1	0	3	2.5	0	0	5
116	148	54	1	0	0	1	24.7	0	1	48	0	1	35	0	1	1	3	2.6	0	0	6
63	181	68	1	0	0	0	20.8	0	0	28	0	0	32	0	0	0	1	2.7	0	0	1
250	170	70	0	1	0	0	24.2	0	1	58	1	1	41	1	1	0	3	3	0	0	4
59	152	50	0	0	0	0	21.6	0	0	73	1	1	30	0	0	1	2	3.4	0	0	2
61	158	58	1	0	0	0	23.2	0	1	61	1	1	31	0	0	1	3	3.6	0	0	4
58	167	86	1	1	0	1	30.8	0	1	31	0	0	42	1	1	0	4	3.9	0	0	5
75	162	74.1	1	1	0	0	28.2	0	1	51	1	1	36	0	1	1	4	4	0	0	6
181	162	74.1	1	1	0	1	28.2	0	1	51	1	1	36	0	1	1	5	4	0	0	7
174	160	88	1	1	1	0	34.4	0	1	31	0	0	38	0	1	1	4	4	0	0	6
101	170	98	1	1	0	0	33.9	0	1	24	0	0	40	0	1	0	2	4	0	0	4
170	183	114	0	1	0	1	34	0	1	20	0	0	45	1	1	0	3	4	0	0	4
144	160	57	0	0	0	0	22.3	0	0	55	1	1	36	0	1	1	2	4.1	0	0	3
53	163	65	1	1	0	0	24.5	0	1	62	1	1	36	0	1	1	4	4.1	0	0	6
64	168	60.6	1	0	0	0	21.5	0	0	65	1	1	31	0	0	0	2	4.3	0	0	2
207	162	77.5	1	1	1	1	29.5	0	1	51	1	1	36.5	0	1	1	6	4.6	0	0	8
67	170	81	1	0	0	0	28	0	1	40	0	1	37	0	1	1	2	4.6	0	0	5
62	159	83	1	1	0	0	32.8	0	1	26	0	0	40	0	1	1	3	4.6	0	0	5
245	165	67.8	1	0	0	1	24.9	0	1	80	1	1	44	1	1	1	5	4.6	0	0	6
143	165	50	0	1	0	1	18.4	0	0	52	1	1	34	0	0	1	4	4.8	0	0	4
173	153	43	0	0	0	1	18.4	0	0	74	1	1	33	0	0	1	3	5	1	1	3
91	160	54	1	1	0	1	21.1	0	0	65	1	1	38	0	1	1	5	5.8	1	1	6
154	160	67	1	1	1	1	26.2	0	1	70	1	1	41	1	1	0	6	6	1	1	7
104	170	82	1	0	1	1	28.4	0	1	54	1	1	43	1	1	0	5	6	1	1	6
163	170	60	1	0	0	0	20.8	0	0	50	0	1	38	0	1	0	1	7	1	1	3
30	155	50	1	0	0	1	20.8	0	0	72	1	1	28	0	0	1	4	8	1	1	4
212	154	53	1	0	0	1	22.3	0	0	48	0	1	32	0	0	1	3	8	1	1	4
185	163	50	1	0	0	0	18.8	0	0	61	1	1	33	0	0	0	2	8	1	1	2
48	150	70	0	1	1	0	31.1	0	1	53	1	1	35.5	0	1	0	3	8	1	1	5
45	162	74	1	1	0	1	28.2	0	1	51	1	1	36	0	1	1	5	8	1	1	7
189	167	63	1	1	0	0	22.6	0	0	62	1	1	36	0	1	0	3	8	1	1	4
218	171	74	1	1	1	0	25.3	0	1	21	0	0	39	0	1	0	3	8	1	1	5
134	170	75	0	0	0	0	26	0	1	51	1	1	39	0	1	0	1	8	1	1	3
41	167	67	1	1	0	1	24	0	1	54	1	1	40	0	1	0	4	8	1	1	6
131	150	55.2	1	0	0	0	24.5	0	1	64	1	1	40	0	1	1	3	8	1	1	5
32	157	79	1	1	0	0	32	0	1	53	1	1	41	1	1	1	5	8	1	1	6
227	170	79	1	1	0	1	27.3	0	1	48	0	1	43	1	1	0	4	8	1	1	6
28	154	52	1	1	0	0	21.9	0	0	71	1	1	32	0	0	1	4	9	1	1	4
166	150	55	1	1	0	1	24.4	0	1	43	0	1	36	0	1	1	4	9	1	1	7
248	163	72	1	0	0	1	27.1	0	1	35	0	0	37	0	1	1	3	9	1	1	5
187	173	82	1	1	0	0	27.4	0	1	28	0	0	39	0	1	0	2	9	1	1	4
129	168	68	0	1	0	0	24.1	0	1	73	1	1	39	0	1	0	2	9	1	1	4
120	173	85	1	1	0	0	28.4	0	1	28	0	0	41	1	1	0	3	9	1	1	4
89	151.5	61.4	1	0	0	1	26.8	0	1	63	1	1	32	0	0	1	4	10	1	1	5
203	160	60	0	0	1	0	23.4	0	1	70	1	1	33	0	0	1	3	10	1	1	4
164	160	60	1	0	0	1	23.4	0	1	46	0	1	34	0	0	1	3	10	1	1	5
122	165	60	0	0	0	1	22	0	0	58	1	1	34	0	0	1	3	10	1	1	3
136	158	70	1	1	0	1	28	0	1	22	0	0	35	0	1	1	4	10	1	1	6
230	161	53	1	1	0	1	20.4	0	0	42	0	1	35	0	1	1	4	10	1	1	6
149	154	63	0	0	0	1	26.6	0	1	77	1	1	35	0	1	1	3	10	1	1	5
171	156	62	1	1	0	1	25.5	0	1	67	1	1	36	0	1	1	5	10	1	1	7
228	156	80	1	1	0	0	32.9	0	1	24	0	0	37	0	1	1	3	10	1	1	5
176	161	84	1	1	0	0	32.4	0	1	48	0	1	38	0	1	1	3	10	1	1	6
115	163	63	1	0	0	1	23.7	0	1	68	1	1	38	0	1	0	3	10	1	1	5
188	154	63	1	0	0	1	26.6	0	1	78	1	1	38	0	1	1	4	10	1	1	6
178	165	85	1	1	0	0	31.2	0	1	66	1	1	39	0	1	1	4	10	1	1	6
251	155	82	1	1	0	1	34.1	0	1	65	1	1	40	0	1	1	5	10	1	1	7
153	153	66	1	0	0	0	28.2	0	1	71	1	1	40	0	1	1	3	10	1	1	5
182	153	67	1	0	1	1	28.6	0	1	71	1	1	42	1	1	1	6	10	1	1	7
208	160	87	1	0	0	1	34	0	1	62	1	1	43	1	1	0	4	10	1	1	5
108	155	73	0	0	0	1	30.4	0	1	73	1	1	43	1	1	0	3	10	1	1	4
85	189	118	1	0	0	1	33	0	1	24	0	0	44	1	1	0	3	10	1	1	4
238	157	54	0	0	1	1	21.9	0	0	53	1	1	33	0	0	1	4	11	1	1	4
88	167	84	1	0	0	1	30.1	0	1	61	1	1	39	0	1	0	3	11	1	1	5
165	165	85	1	0	0	1	31.2	0	1	20	0	0	42	1	1	0	3	11	1	1	4
141	155	68	0	0	0	0	28.3	0	1	45	0	1	34	0	0	1	1	12	1	1	3
2	155	54	0	1	0	1	22.5	0	0	69	1	1	34	0	0	0	3	12	1	1	3
206	160	69	1	0	0	1	27	0	1	48	0	1	36	0	1	1	3	12	1	1	6
236	153	80	1	0	1	1	34.2	0	1	52	1	1	40	0	1	1	5	12	1	1	7
111	183	108	1	0	0	1	32.2	0	1	24	0	0	42	1	1	0	3	12	1	1	4
215	170	85	1	1	1	1	29.4	0	1	55	1	1	42	1	1	0	6	12	1	1	7
18	180	108	1	1	1	1	33.3	0	1	27	0	0	48	1	1	1	6	12	1	1	7
241	165	49	1	1	0	0	18	0	0	42	0	1	32	0	0	1	3	13	1	1	4
186	153	67.2	1	0	0	1	28.7	0	1	69	1	1	35	0	1	1	4	13	1	1	6
128	161	65	1	1	0	0	25.1	0	1	69	1	1	38	0	1	0	3	13.6	1	1	5
205	145	53	1	1	0	1	25.2	0	1	65	1	1	33	0	0	1	5	14	1	1	6
15	174	74	1	0	0	1	24.4	0	1	55	1	1	36	0	1	0	3	14	1	1	5
49	155	83	0	0	0	0	34.5	0	1	54	1	1	36.5	0	1	1	2	14	1	1	4
152	167	71	1	1	0	0	25.5	0	1	53	1	1	40	0	1	0	3	14	1	1	5
113	155	75	1	1	0	1	31.2	0	1	24	0	0	41	1	1	0	4	14	1	1	5
220	175	90	1	1	1	0	29.4	0	1	48	0	1	45	1	1	0	4	14	1	1	6
46	155	61	1	1	0	1	25.4	0	1	68	1	1	35	0	1	0	4	15	2	1	6
31	154	65	1	0	0	0	27.4	0	1	49	0	1	36	0	1	1	2	15	2	1	5
102	164	60.3	1	0	0	0	22.4	0	0	63	1	1	38	0	1	0	2	15	2	1	3
151	164	62.5	1	0	0	0	23.2	0	1	63	1	1	38	0	1	0	2	15	2	1	4
24	170	85	1	0	1	0	29.4	0	1	57	1	1	39	0	1	0	3	15	2	1	5
27	165	90	1	0	1	1	33.1	0	1	65	1	1	43	1	1	0	5	16	2	1	6
47	168	70	1	0	1	1	24.8	0	1	60	1	1	44	1	1	0	5	16	2	1	6
127	160	67	1	1	0	0	26.2	0	1	43	0	1	35	0	1	1	3	17	2	1	6
37	150	65	1	1	0	1	28.9	0	1	59	1	1	36	0	1	1	5	17	2	1	7
232	157	63	1	1	0	1	25.6	0	1	43	0	1	37	0	1	1	4	17	2	1	7
222	179	73	1	1	0	0	22.8	0	0	35	0	0	37	0	1	0	2	18	2	1	3
140	155	60	1	1	0	1	25	0	1	55	1	1	38	0	1	1	5	18	2	1	7
4	155	60	1	1	0	1	25	0	1	55	1	1	42	1	1	1	6	18	2	1	7
83	170	85	1	0	0	0	29.4	0	1	57	1	1	43	1	1	0	3	18	2	1	4
121	173	88.4	1	0	0	1	29.5	0	1	20	0	0	37	0	1	0	2	19	2	1	4
194	168.5	95	1	1	1	0	33.5	0	1	37	0	0	38	0	1	0	3	19	2	1	5
1	178	71	0	1	0	1	22.4	0	0	75	1	1	38	0	1	0	3	19	2	1	4
150	173	71.5	0	1	1	1	23.9	0	1	68	1	1	39	0	1	0	4	19	2	1	6
106	176	100	1	1	0	1	32.3	0	1	54	1	1	43	1	1	0	5	19	2	1	6
246	163	87	1	0	0	1	32.7	0	1	19	0	0	44	1	1	1	4	19	2	1	5
40	155	57	1	1	1	1	23.7	0	1	58	1	1	33	0	0	1	6	20	2	1	7
172	150	57	1	1	0	1	25.3	0	1	63	1	1	35	0	1	1	5	20	2	1	7
213	150	46	1	0	0	1	20.4	0	0	65	1	1	38	0	1	1	4	20	2	1	5
110	155	72	1	0	0	1	30	0	1	57	1	1	39	0	1	1	4	20	2	1	6
38	157	62	0	1	0	1	25.2	0	1	76	1	1	39	0	1	0	3	20	2	1	5
86	179	85	1	1	0	0	26.5	0	1	36	0	0	40	0	1	0	2	20	2	1	4
94	168	80	1	1	1	1	28.3	0	1	71	1	1	42	1	1	0	6	20	2	1	7
42	175	87	1	0	0	1	28.4	0	1	50	0	1	45	1	1	0	3	20	2	1	5
221	153	54	1	0	0	1	23.1	0	1	60	1	1	32	0	0	1	4	21	2	1	5
119	150	45	0	0	0	1	20	0	0	68	1	1	33	0	0	1	3	21	2	1	3
132	160	80	1	0	0	1	31.2	0	1	55	1	1	37	0	1	1	4	21	2	1	6
92	160	80	1	0	0	1	31.2	0	1	55	1	1	38	0	1	1	4	21	2	1	6
184	161	75	1	0	0	1	28.9	0	1	57	1	1	38	0	1	0	3	21	2	1	5
98	168	86.7	1	0	1	0	30.7	0	1	42	0	1	39	0	1	0	2	21.6	2	1	5
21	150	45	1	0	0	1	20	0	0	66	1	1	28	0	0	1	4	22	2	1	4
225	173	78	1	0	0	1	26.1	0	1	63	1	1	38	0	1	0	3	22	2	1	5
74	176	83	1	0	0	1	26.8	0	1	66	1	1	40	0	1	0	3	22	2	1	5
179	176	77	1	0	0	1	24.9	0	1	69	1	1	40	0	1	0	3	22	2	1	5
16	175	79	1	0	1	1	25.8	0	1	62	1	1	41	1	1	0	5	22	2	1	6
214	180	84	1	0	1	0	25.9	0	1	30	0	0	40	0	1	0	2	23	2	1	4
233	175	80	1	1	1	1	26.1	0	1	58	1	1	41	1	1	0	6	23	2	1	7
169	164	92	1	0	0	0	34.2	0	1	29	0	0	42	1	1	1	3	23	2	1	4
26	155	50	1	1	0	0	20.8	0	0	57	1	1	31	0	0	1	4	24	2	1	4
25	174	65	1	0	0	1	21.5	0	0	60	1	1	35	0	1	0	3	24	2	1	4
244	165	70	1	0	0	0	25.7	0	1	62	1	1	39	0	1	0	2	24	2	1	4
242	161	79.9	1	1	0	1	30.8	0	1	67	1	1	41	1	1	0	5	24	2	1	6
216	170	70	1	1	1	0	24.2	0	1	43	0	1	39	0	1	0	3	25	2	1	6
167	175	83	1	0	0	1	27.1	0	1	58	1	1	39	0	1	0	3	25	2	1	5
103	165	76	1	0	1	1	27.9	0	1	68	1	1	42	1	1	0	5	25	2	1	6
44	169	71.5	1	1	0	0	25	0	1	51	1	1	45	1	1	0	4	25	2	1	5
180	160	73	1	0	0	1	28.5	0	1	61	1	1	42	1	1	0	4	26	2	1	5
76	160	73	1	0	0	1	28.5	0	1	61	1	1	42	1	1	0	4	26	2	1	5
234	167	60.4	1	0	1	1	21.7	0	0	65	1	1	37	0	1	0	4	27	2	1	5
107	171	70	1	0	0	0	23.9	0	1	66	1	1	39	0	1	0	2	27	2	1	4
209	174	74	1	0	0	1	24.4	0	1	67	1	1	39	0	1	0	3	27	2	1	5
239	156	85	0	1	0	1	34.9	0	1	63	1	1	40	0	1	1	4	28	2	1	6
158	150	49	1	1	1	0	21.8	0	0	69	1	1	32	0	0	1	5	30	3	1	5
7	165	65	1	0	1	1	23.9	0	1	72	1	1	37	0	1	0	4	30	3	1	6
226	163	63.9	1	1	0	0	24.1	0	1	43	0	1	38	0	1	0	2	30	3	1	5
72	150	74	1	1	1	1	32.9	0	1	33	0	0	41.3	1	1	1	6	30	3	1	7
223	158	41.1	0	1	0	0	16.5	0	0	51	1	1	29	0	0	1	3	31	3	1	3
36	163	64	1	1	0	0	24.1	0	1	59	1	1	38	0	1	0	3	31	3	1	5
33	168	77.6	1	0	0	1	27.5	0	1	63	1	1	41	1	1	0	4	32	3	1	5
10	159	65	1	0	1	1	25.7	0	1	70	1	1	41	1	1	0	5	32.4	3	1	6
190	153	58	1	1	0	0	24.8	0	1	64	1	1	37	0	1	1	4	33	3	1	6
34	166	52	1	0	0	1	18.9	0	0	76	1	1	37	0	1	0	3	33	3	1	4
240	157	74.6	1	0	1	0	30.3	0	1	67	1	1	39	0	1	1	4	33	3	1	6
96	175	90	1	1	0	1	29.4	0	1	34	0	0	40	0	1	0	3	33	3	1	5
177	175	86	1	0	0	1	28.1	0	1	34	0	0	42	1	1	0	3	33	3	1	4
138	160	68	0	0	0	0	26.6	0	1	50	0	1	45	1	1	1	2	33	3	1	4
43	161	80	1	1	0	1	30.9	0	1	44	0	1	38	0	1	1	4	34	3	1	7
135	150	70	1	1	0	1	31.1	0	1	55	1	1	35	0	1	1	5	35	3	1	7
99	163	61.5	1	1	1	0	23.1	0	1	66	1	1	37	0	1	0	4	35	3	1	6
11	167	79	1	0		1	28.3	0	1	68	1	1	40	0	1	0	3	37.1	3	1	5
114	153	60	1	0	0	0	25.6	0	1	63	1	1	35	0	1	1	3	38	3	1	5
183	167	82	1	0	1	1	29.4	0	1	64	1	1	40	0	1	0	4	38	3	1	6
249	155	52	1	0	1	0	21.6	0	0	71	1	1	34	0	0	1	4	39	3	1	4
204	173	87	0	1	0	0	29.1	0	1	70	1	1	37	0	1	1	3	39	3	1	5
126	154	73	1	1	0	1	30.8	0	1	62	1	1	38	0	1	1	5	39	3	1	7
155	148	52	0	0	0	1	23.7	0	1	70	1	1	41	1	1	1	4	39	3	1	5
112	150	70	1	1	0	1	31.1	0	1	55	1	1	35	0	1	1	5	40	3	1	7
23	170	70	1	1	1	1	24.2	0	1	51	1	1	39	0	1	0	5	40	3	1	7
117	169.5	91.3	1	0	0	1	31.8	0	1	29	0	0	46	1	1	0	3	40	3	1	4
5	161	79	1	0	1	0	30.5	0	1	26	0	0	37	0	1	1	3	41	3	1	5
210	168	71	1	0	1	1	25.2	0	1	51	1	1	37	0	1	0	4	42	3	1	6
202	157	67	0	0	0	0	27.2	0	1	68	1	1	38	0	1	1	2	42	3	1	4
231	150	65	1	1	0	1	28.9	0	1	79	1	1	43	1	1	1	6	43	3	1	7
235	175	80	1	1	0	1	26.1	0	1	57	1	1	39	0	1	0	4	45	3	1	6
19	160	69	1	0	0	1	27	0	1	59	1	1	42	1	1	0	4	48	3	1	5
142	160	60	1	0	0	1	23.4	0	1	74	1	1	38	0	1	0	3	51	3	1	5
195	158.5	65.7	1	1	0	1	26.2	0	1	75	1	1	42	1	1	0	5	51	3	1	6
50	165	93	1	0	0	1	34.2	0	1	42	0	1	38.5	0	1	1	3	52.5	3	1	6
145	173	63	1	1	1	0	21	0	0	23	0	0	35	0	1	0	3	54	3	1	4
133	170	68	1	0	0	0	23.5	0	1	48	0	1	39	0	1	0	1	57	3	1	4
198	180	77	1	1	1	1	23.8	0	1	52	1	1	42	1	1	0	6	60	3	1	7
29	175	90	1	1	1	0	29.4	0	1	38	0	0	40	0	1	0	3	70	3	1	5
124	175	80	1	1	1	0	26.1	0	1	43	0	1	43	1	1	0	4	70	3	1	6
